# Supplementary material for: Integrated Quantitative Targeted Lipidomics and Proteomics Reveal Unique Fingerprints of Multiple Metabolic Conditions
Source: MDPI journal article supplement (doi:10.3390/biom12101439), 2022-10-08
Supplement: s1 [file s1]

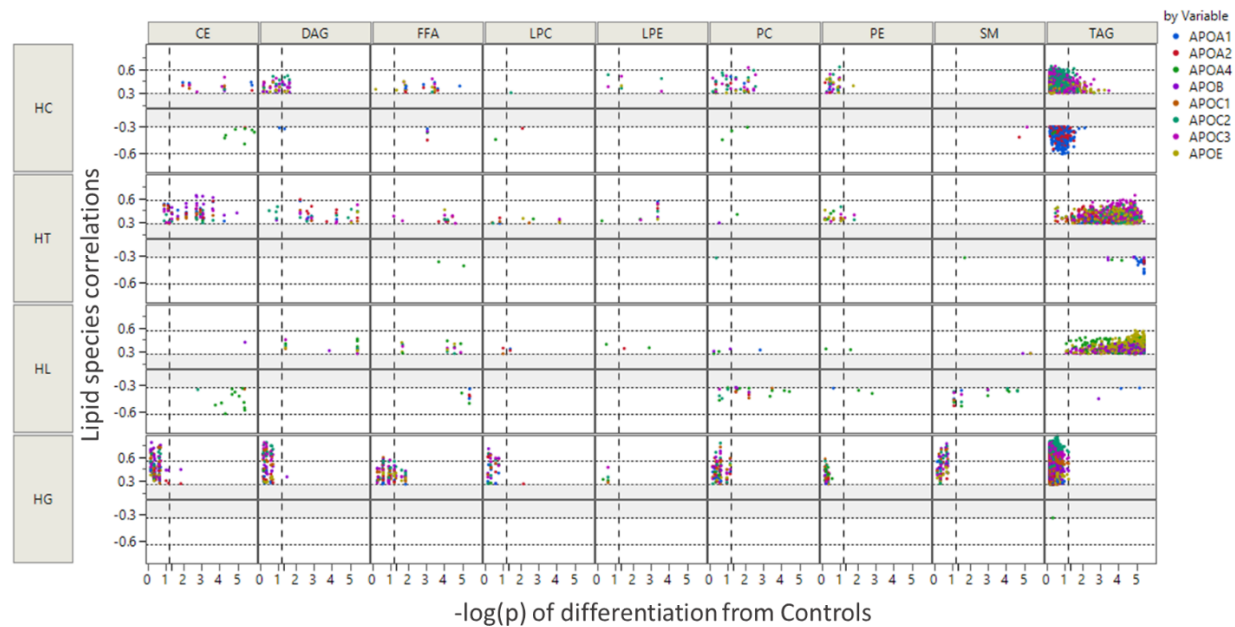

**Figure S1.** Pearson correlation between apolipoproteins and lipid species did not follow the trend in significant differentiation from the NL group.

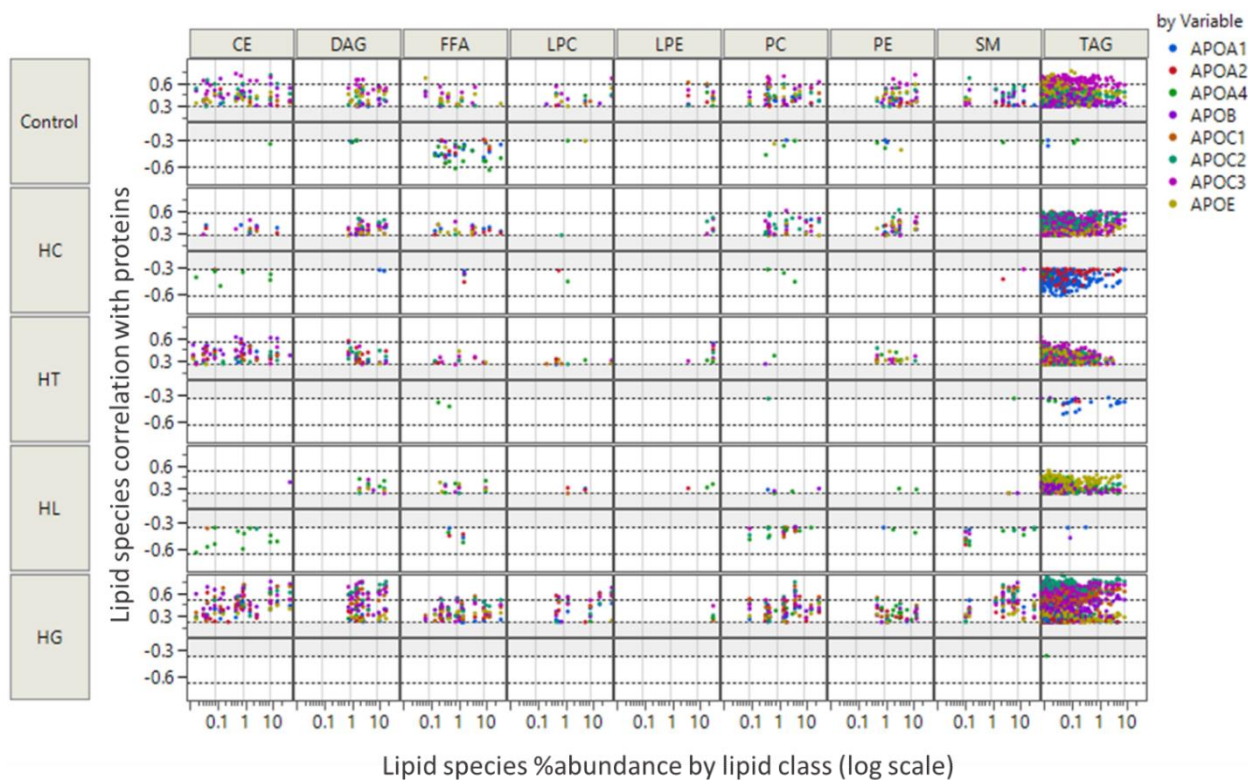

**Figure S2.** Pearson correlation between apolipoproteins and lipid species did not follow the order of %Abundance of species in lipid classes.

**a**

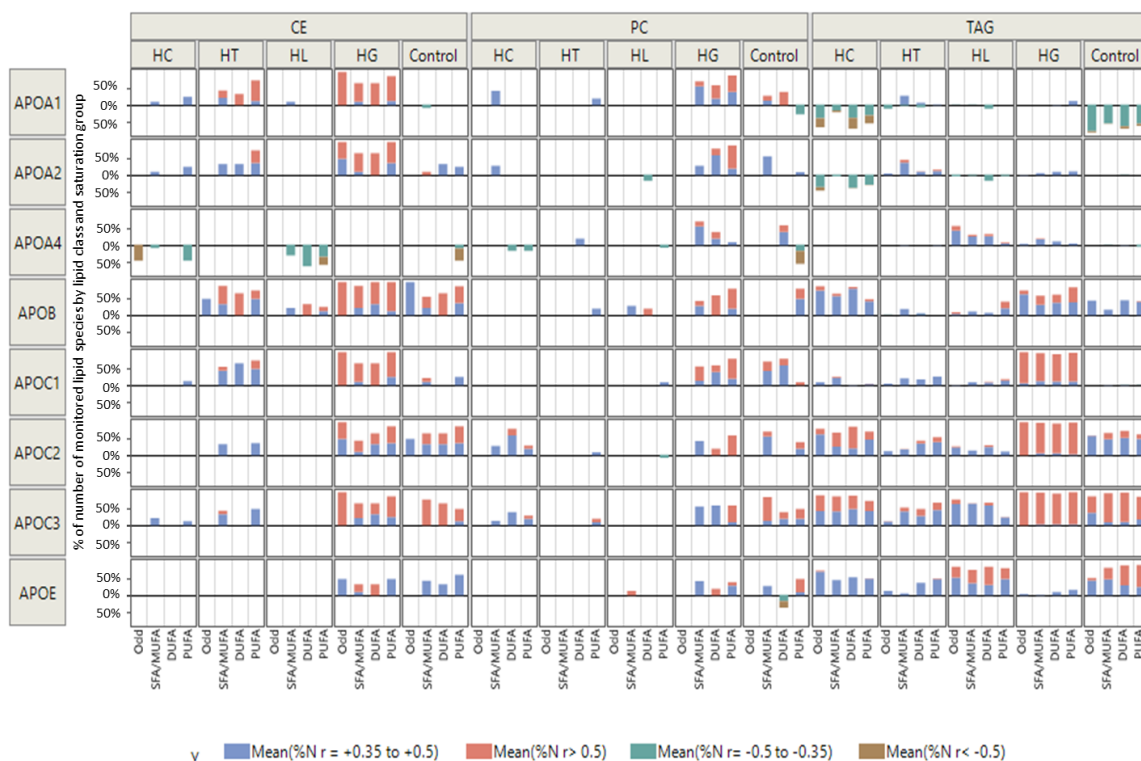

**b**

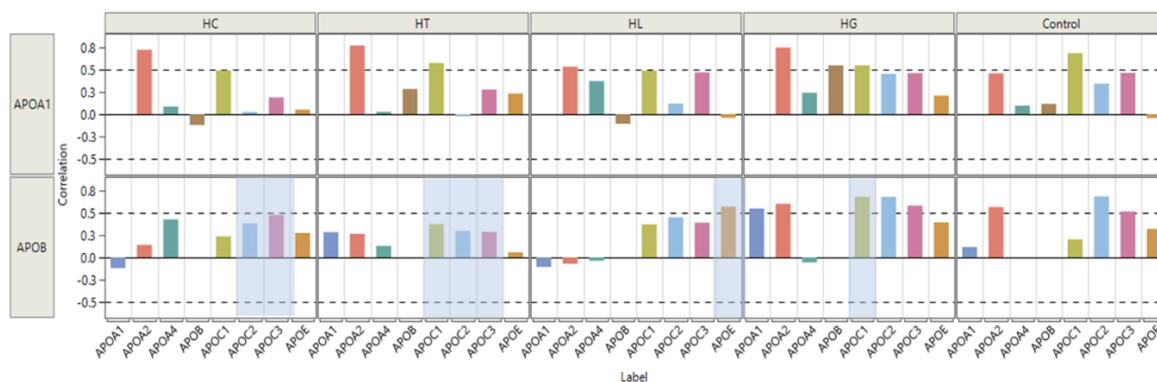

**Figure S3.** Percent proportion of correlating lipid species relative to the total number of monitored species, and correlation of apos A1 and B with other apos. (a) Percentage of the number of lipid species that significantly correlated with apolipoproteins in CE, PC, and TAG sub-classes (SFA/MUFA, PUFA, DUFA, or odd-chain FA) for HC, HT, HL, and HG. Stacked bar graphs indicate Pearson correlations  $r > 0.3$  (blue),  $r > 0.5$  (red),  $r < -0.3$  (green) and  $r < -0.5$  (brown) (regardless of up-or down-regulation relative to NL, as in Fig. 4). (b) Pierson correction coefficient of apoA1 and apoB with exchangeable apos.

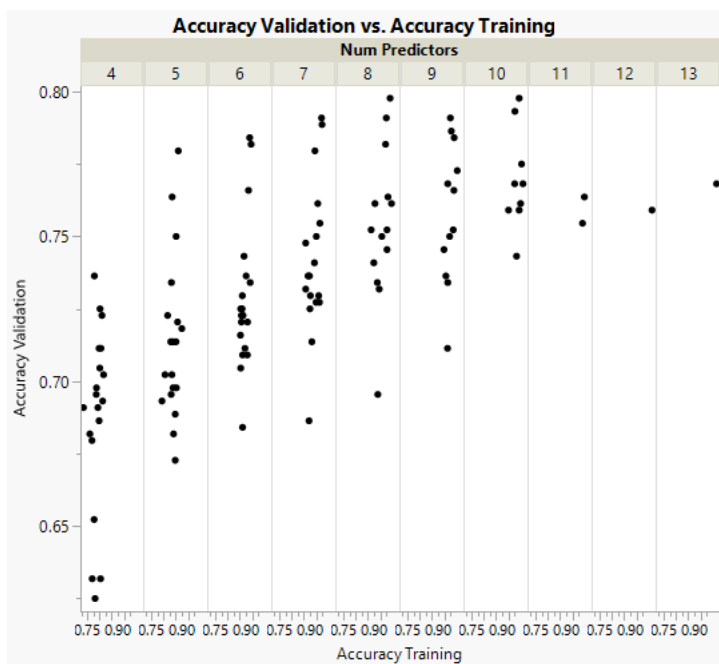

**Figure S4.** Optimization of predictors combinations using 3 to 14 variables from the list of top 20 predictors for the final ANN model. Each ANN model was evaluated based on accuracy parameters for the training and test set.

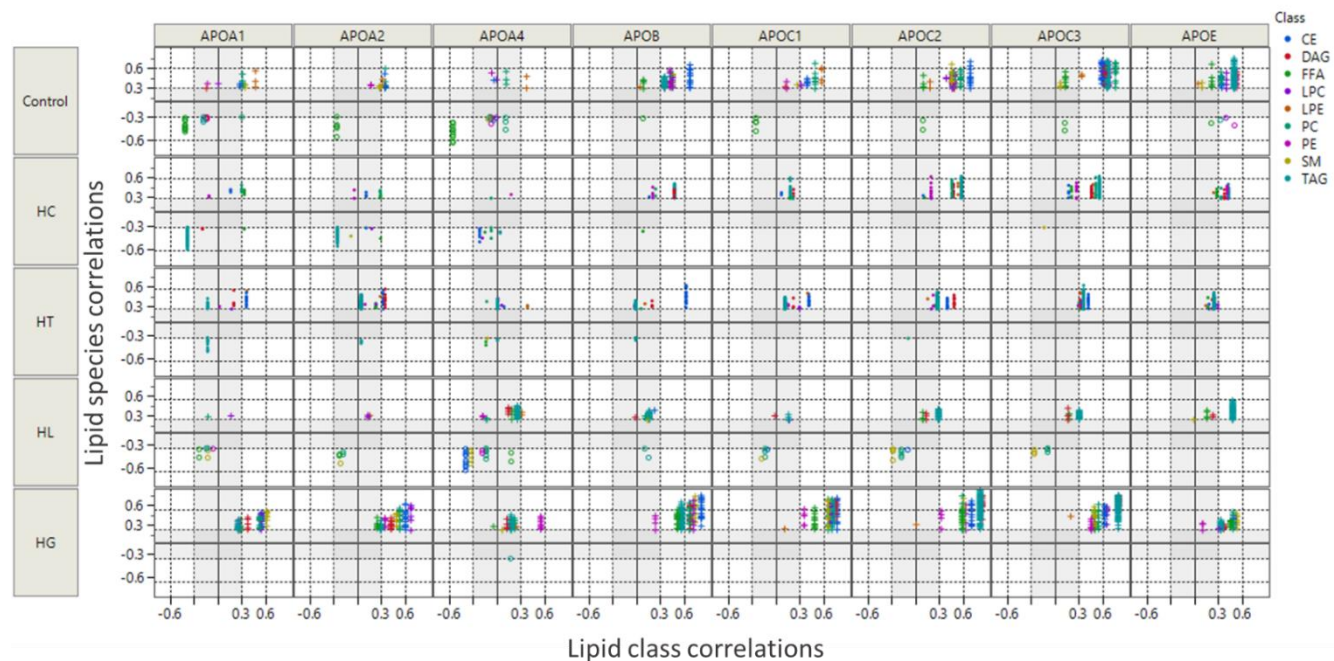

**Figure S5.** Lack of agreement of Pearson correlations between proteins and lipid species (y-axis) versus between proteins and lipid classes (x-axis), indicating unique information provided by correlation with lipid species.

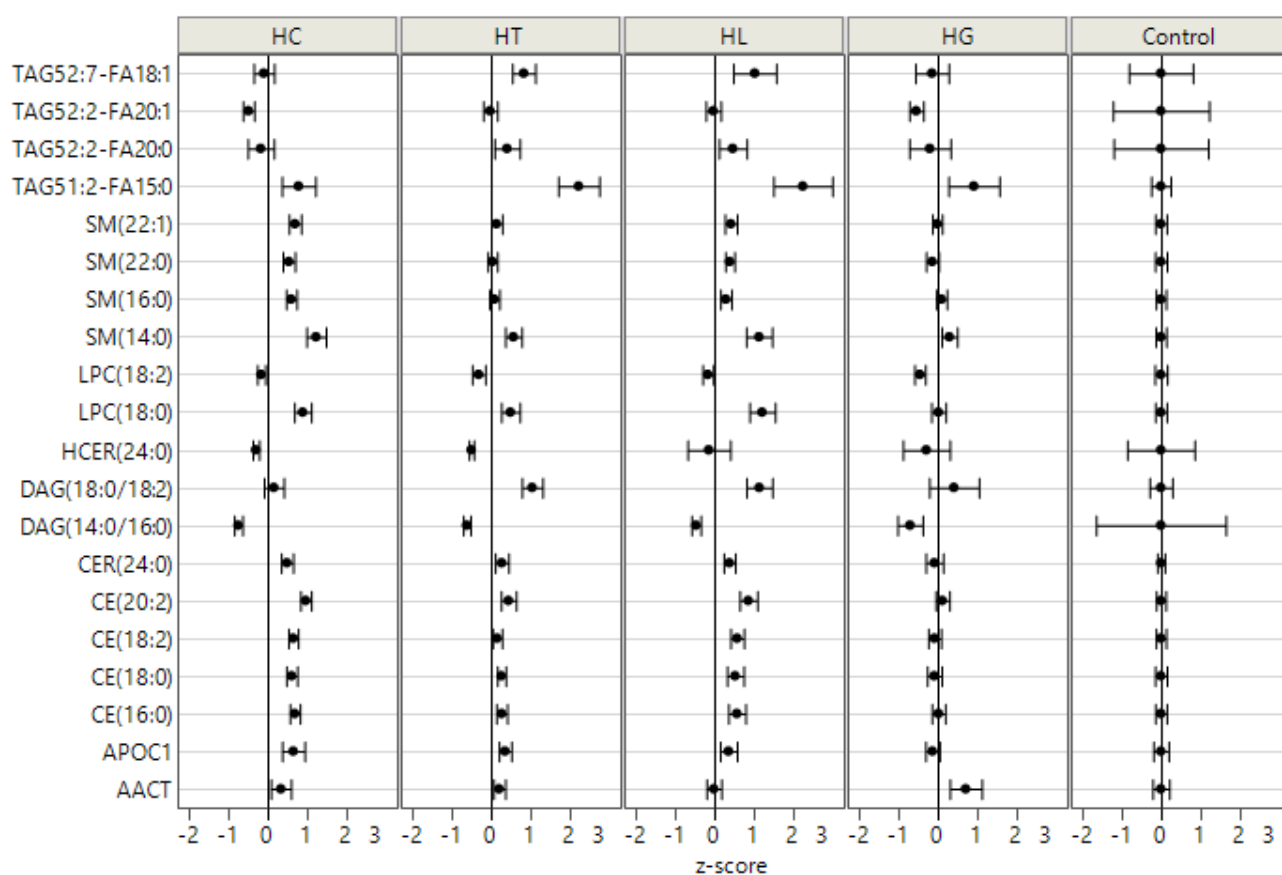

**Figure S6.** Various degrees of up and downregulation of top 20 variables in metabolic groups relative to the normolipidemic control group.

**a**

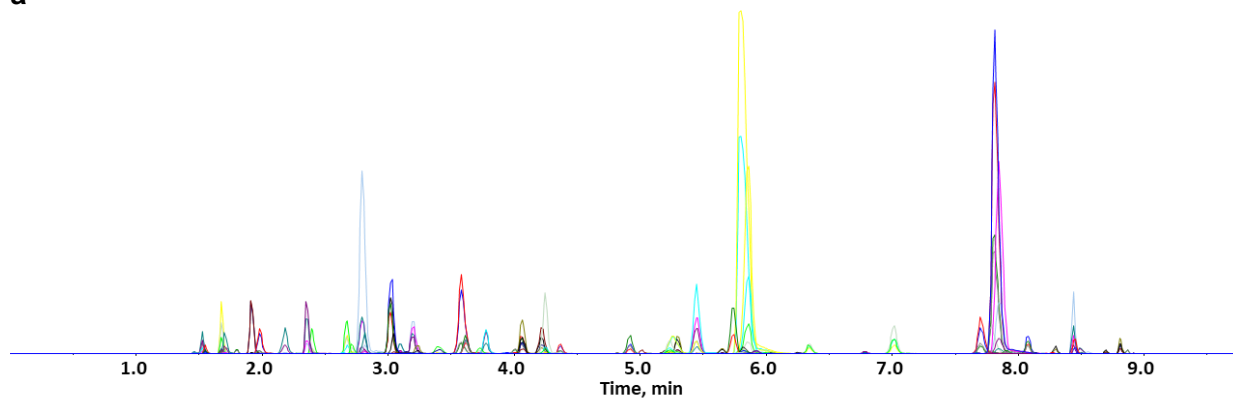

**b**

### APOA1

| Protein | Q1 Mass | Q3 Mass | Transition Name              |
|---------|---------|---------|------------------------------|
| APOA1   | 608.31  | 777.44  | APOA1.ATEHLSTLSEK.+2y7.light |
| APOA1   | 608.31  | 664.35  | APOA1.ATEHLSTLSEK.+2y6.light |
| APOA1   | 611.82  | 784.45  | APOA1.ATEHLSTLSEK.+2y7.heavy |
| APOA1   | 611.82  | 671.37  | APOA1.ATEHLSTLSEK.+2y6.heavy |
| APOA1   | 651.33  | 1063.54 | APOA1.THLAPYSDELK.+2y9.light |
| APOA1   | 651.33  | 950.46  | APOA1.THLAPYSDELK.+2y8.light |
| APOA1   | 654.84  | 1070.56 | APOA1.THLAPYSDELK.+2y9.heavy |
| APOA1   | 654.84  | 957.47  | APOA1.THLAPYSDELK.+2y8.heavy |
| APOA1   | 506.79  | 813.45  | APOA1.AKPALEDLR.+2y7.light   |
| APOA1   | 506.79  | 716.39  | APOA1.AKPALEDLR.+2y6.light   |
| APOA1   | 510.30  | 820.46  | APOA1.AKPALEDLR.+2y7.heavy   |
| APOA1   | 510.30  | 723.41  | APOA1.AKPALEDLR.+2y6.heavy   |

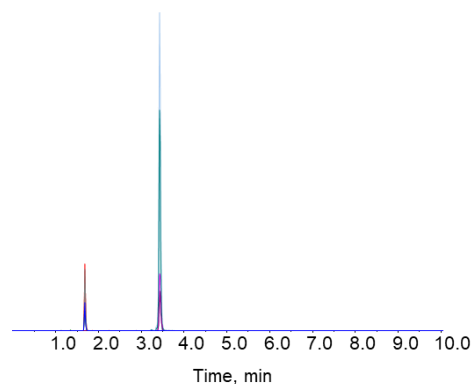

### AACT

| Protein | Q1 Mass | Q3 Mass | Transition Name           |
|---------|---------|---------|---------------------------|
| AACT    | 531.30  | 819.46  | AACT.EIGELYLPK.+2y7.light |
| AACT    | 531.30  | 762.44  | AACT.EIGELYLPK.+2y6.light |
| AACT    | 535.30  | 827.48  | AACT.EIGELYLPK.+2y7.heavy |
| AACT    | 535.30  | 770.45  | AACT.EIGELYLPK.+2y6.heavy |

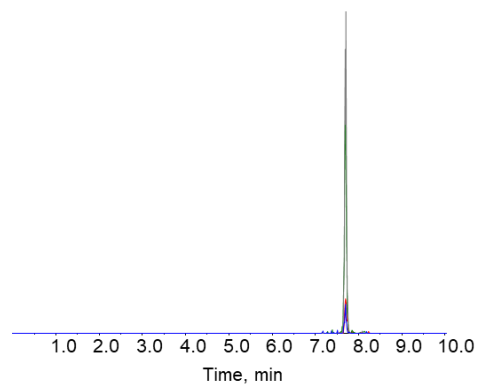

## APOA2

| Protein | Q1 Mass | Q3 Mass | Transition Name           |
|---------|---------|---------|---------------------------|
| APOA2   | 471.29  | 571.38  | APOA2.EQLTPLIK.+2y5.light |
| APOA2   | 471.29  | 470.33  | APOA2.EQLTPLIK.+2y4.light |
| APOA2   | 474.80  | 578.40  | APOA2.EQLTPLIK.+2y5.heavy |
| APOA2   | 474.80  | 477.35  | APOA2.EQLTPLIK.+2y4.heavy |

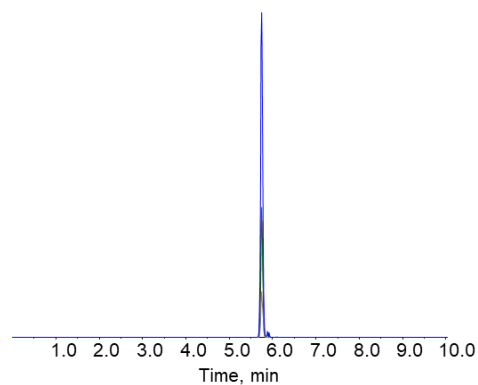

## APOA4

| Protein | Q1 Mass | Q3 Mass | Transition Name            |
|---------|---------|---------|----------------------------|
| APOA4   | 552.79  | 862.44  | APOA4.LEPYADQLR.+2y7.light |
| APOA4   | 552.79  | 765.39  | APOA4.LEPYADQLR.+2y6.light |
| APOA4   | 556.30  | 869.46  | APOA4.LEPYADQLR.+2y7.heavy |
| APOA4   | 556.30  | 772.41  | APOA4.LEPYADQLR.+2y6.heavy |
| APOA4   | 542.27  | 869.40  | APOA4.LTPYADEFK.+2y7.light |
| APOA4   | 542.27  | 772.35  | APOA4.LTPYADEFK.+2y6.light |
| APOA4   | 546.28  | 877.42  | APOA4.LTPYADEFK.+2y7.heavy |
| APOA4   | 546.28  | 780.37  | APOA4.LTPYADEFK.+2y6.heavy |

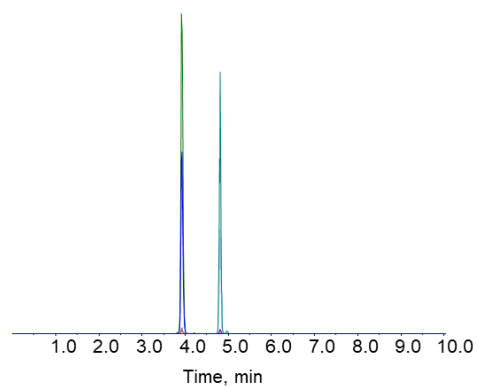

## APOB

| Protein | Q1 Mass | Q3 Mass | Transition Name             |
|---------|---------|---------|-----------------------------|
| APOB    | 621.82  | 914.46  | APOB.ATGVLYDYVVK.+2y7.light |
| APOB    | 621.82  | 801.38  | APOB.ATGVLYDYVVK.+2y6.light |
| APOB    | 624.83  | 920.48  | APOB.ATGVLYDYVVK.+2y7.heavy |
| APOB    | 624.83  | 807.39  | APOB.ATGVLYDYVVK.+2y6.heavy |
| APOB    | 371.73  | 600.38  | APOB.AAIQALR.+2y5.light     |
| APOB    | 371.73  | 487.30  | APOB.AAIQALR.+2y4.light     |
| APOB    | 375.24  | 607.40  | APOB.AAIQALR.+2y5.heavy     |
| APOB    | 375.24  | 494.32  | APOB.AAIQALR.+2y4.heavy     |
| APOB    | 506.82  | 741.49  | APOB.TGISPLAIK.+2y7.light   |
| APOB    | 506.82  | 654.45  | APOB.TGISPLAIK.+2y6.light   |
| APOB    | 510.33  | 748.50  | APOB.TGISPLAIK.+2y7.heavy   |

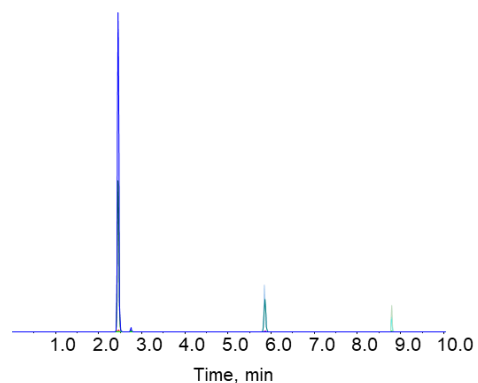



## APOC1

| Protein | Q1 Mass | Q3 Mass | Transition Name             |
|---------|---------|---------|-----------------------------|
| APOC1   | 601.28  | 886.43  | APOC1.EWFSETFQK.+2y7.light  |
| APOC1   | 601.28  | 739.36  | APOC1.EWFSETFQK.+2y6.light  |
| APOC1   | 605.29  | 894.44  | APOC1.EWFSETFQK.+2y7.heavy  |
| APOC1   | 605.29  | 747.38  | APOC1.EWFSETFQK.+2y6.heavy  |
| APOC1   | 516.76  | 834.42  | APOC1.TPDVSSALDK.+2y8.light |
| APOC1   | 516.76  | 620.32  | APOC1.TPDVSSALDK.+2y6.light |
| APOC1   | 520.27  | 841.44  | APOC1.TPDVSSALDK.+2y8.heavy |
| APOC1   | 520.27  | 627.34  | APOC1.TPDVSSALDK.+2y6.heavy |

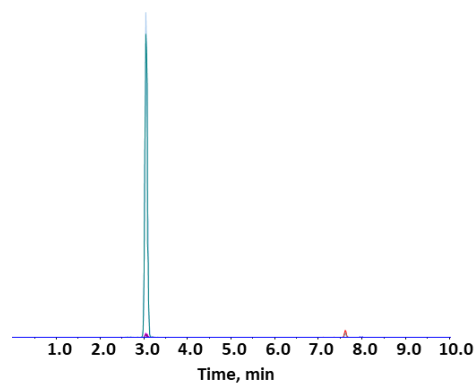

## APOC2

| Protein | Q1 Mass | Q3 Mass | Transition Name              |
|---------|---------|---------|------------------------------|
| APOC2   | 643.80  | 957.43  | APOC2.ESLSSYWESAK.+2y8.light |
| APOC2   | 643.80  | 870.40  | APOC2.ESLSSYWESAK.+2y7.light |
| APOC2   | 647.81  | 965.45  | APOC2.ESLSSYWESAK.+2y8.heavy |
| APOC2   | 647.81  | 878.41  | APOC2.ESLSSYWESAK.+2y7.heavy |
| APOC2   | 518.27  | 771.42  | APOC2.TYLPVAVDEK.+2y7.light  |
| APOC2   | 518.27  | 658.34  | APOC2.TYLPVAVDEK.+2y6.light  |
| APOC2   | 521.28  | 777.44  | APOC2.TYLPVAVDEK.+2y7.heavy  |
| APOC2   | 521.28  | 664.35  | APOC2.TYLPVAVDEK.+2y6.heavy  |

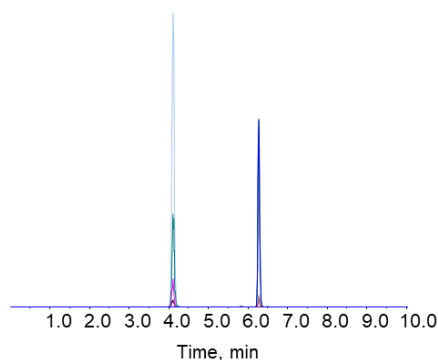

## APOC3

| Protein | Q1 Mass | Q3 Mass | Transition Name                   |
|---------|---------|---------|-----------------------------------|
| APOC3   | 858.93  | 1016.51 | APOC3.DALSSVQESQVAQQAR.+2y9.light |
| APOC3   | 858.93  | 887.47  | APOC3.DALSSVQESQVAQQAR.+2y8.light |
| APOC3   | 862.43  | 1023.52 | APOC3.DALSSVQESQVAQQAR.+2y9.heavy |
| APOC3   | 862.43  | 894.48  | APOC3.DALSSVQESQVAQQAR.+2y8.heavy |
| APOC3   | 598.80  | 854.43  | APOC3.GWVTDGFSSLK.+2y8.light      |
| APOC3   | 598.80  | 753.38  | APOC3.GWVTDGFSSLK.+2y7.light      |
| APOC3   | 602.31  | 861.44  | APOC3.GWVTDGFSSLK.+2y8.heavy      |
| APOC3   | 602.31  | 760.39  | APOC3.GWVTDGFSSLK.+2y7.heavy      |

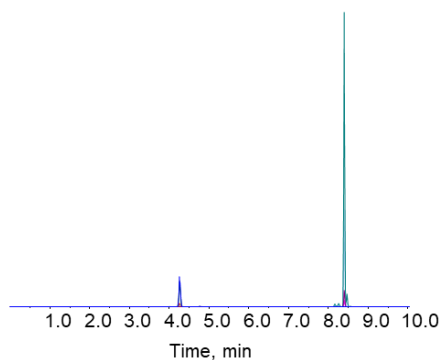

## APOD

| Protein | Q1 Mass | Q3 Mass | Transition Name         |
|---------|---------|---------|-------------------------|
| APOD    | 436.25  | 772.43  | APOD.VLNQELR.+2y6.light |
| APOD    | 436.25  | 659.35  | APOD.VLNQELR.+2y5.light |
| APOD    | 439.76  | 779.45  | APOD.VLNQELR.+2y6.heavy |
| APOD    | 439.76  | 666.36  | APOD.VLNQELR.+2y5.heavy |

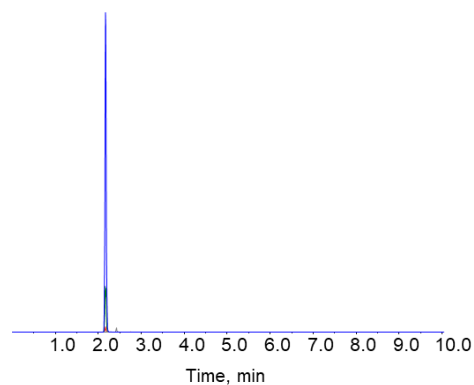

## APOE

| Protein | Q1 Mass | Q3 Mass | Transition Name                |
|---------|---------|---------|--------------------------------|
| APOE    | 749.40  | 898.47  | APOE.AATVGSAGQPLQER.+2y8.light |
| APOE    | 749.40  | 827.44  | APOE.AATVGSAGQPLQER.+2y7.light |
| APOE    | 752.91  | 905.48  | APOE.AATVGSAGQPLQER.+2y8.heavy |
| APOE    | 752.91  | 834.45  | APOE.AATVGSAGQPLQER.+2y7.heavy |
| APOE    | 484.78  | 588.31  | APOE.LGPLVEQGR.+2y5.light      |
| APOE    | 484.78  | 489.24  | APOE.LGPLVEQGR.+2y4.light      |
| APOE    | 488.29  | 595.32  | APOE.LGPLVEQGR.+2y5.heavy      |
| APOE    | 488.29  | 496.25  | APOE.LGPLVEQGR.+2y4.heavy      |
| APOE    | 517.27  | 792.40  | APOE.LQAEAFQAR.+2y7.light      |
| APOE    | 517.27  | 721.36  | APOE.LQAEAFQAR.+2y6.light      |
| APOE    | 520.78  | 799.41  | APOE.LQAEAFQAR.+2y7.heavy      |
| APOE    | 520.78  | 728.37  | APOE.LQAEAFQAR.+2y6.heavy      |

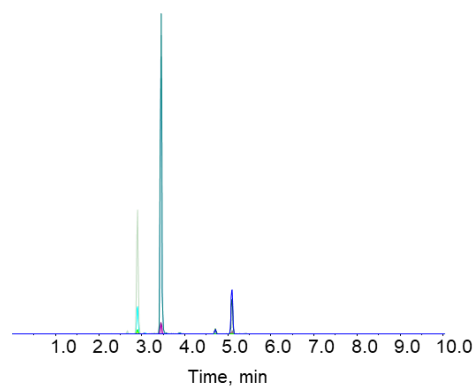

## APOM

| Protein | Q1 Mass | Q3 Mass | Transition Name        |
|---------|---------|---------|------------------------|
| APOM    | 413.23  | 565.31  | APOM.FLLYNR.+2y4.light |
| APOM    | 413.23  | 452.23  | APOM.FLLYNR.+2y3.light |
| APOM    | 416.74  | 572.33  | APOM.FLLYNR.+2y4.heavy |
| APOM    | 416.74  | 452.23  | APOM.FLLYNR.+2y3.heavy |

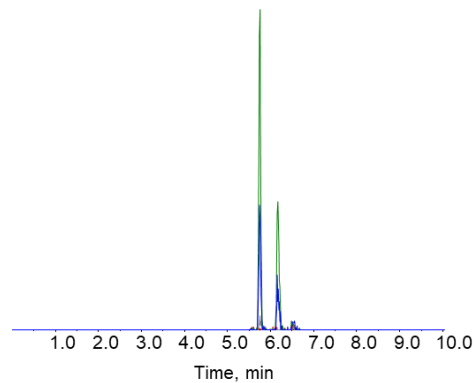

## CETP

| Protein | Q1 Mass    | Q3 Mass    | Transition Name           |
|---------|------------|------------|---------------------------|
| CETP    | 495.777373 | 788.469872 | CETP.AMMLLGQVK.+2y7.light |
| CETP    | 495.777373 | 657.429387 | CETP.AMMLLGQVK.+2y6.light |
| CETP    | 498.784278 | 794.483681 | CETP.AMMLLGQVK.+2y7.heavy |
| CETP    | 498.784278 | 663.443196 | CETP.AMMLLGQVK.+2y6.heavy |
| CETP    | 481.774534 | 863.473377 | CETP.VIQTAFQR.+2y7.light  |
| CETP    | 481.774534 | 750.389313 | CETP.VIQTAFQR.+2y6.light  |
| CETP    | 481.774534 | 622.330736 | CETP.VIQTAFQR.+2y5.light  |
| CETP    | 481.774534 | 521.283057 | CETP.VIQTAFQR.+2y4.light  |
| CETP    | 486.778668 | 873.481646 | CETP.VIQTAFQR.+2y7.heavy  |
| CETP    | 486.778668 | 760.397582 | CETP.VIQTAFQR.+2y6.heavy  |
| CETP    | 486.778668 | 632.339005 | CETP.VIQTAFQR.+2y5.heavy  |
| CETP    | 486.778668 | 531.291326 | CETP.VIQTAFQR.+2y4.heavy  |

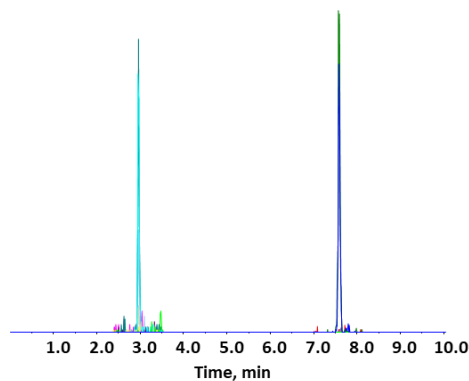

## HP

| Protein | Q1 Mass    | Q3 Mass    | Transition Name      |
|---------|------------|------------|----------------------|
| HP      | 352.190302 | 604.304915 | HP.VSVNER.+2y5.light |
| HP      | 352.190302 | 517.272886 | HP.VSVNER.+2y4.light |
| HP      | 352.190302 | 418.204472 | HP.VSVNER.+2y3.light |
| HP      | 357.194437 | 614.313184 | HP.VSVNER.+2y5.heavy |
| HP      | 357.194437 | 527.281155 | HP.VSVNER.+2y4.heavy |
| HP      | 357.194437 | 428.212741 | HP.VSVNER.+2y3.heavy |
| HP      | 380.703046 | 613.330401 | HP.FTDHLK.+2y5.light |
| HP      | 380.703046 | 512.282723 | HP.FTDHLK.+2y4.light |
| HP      | 380.703046 | 397.25578  | HP.FTDHLK.+2y3.light |
| HP      | 384.710145 | 621.3446   | HP.FTDHLK.+2y5.heavy |
| HP      | 384.710145 | 520.296922 | HP.FTDHLK.+2y4.heavy |
| HP      | 384.710145 | 405.269979 | HP.FTDHLK.+2y3.heavy |

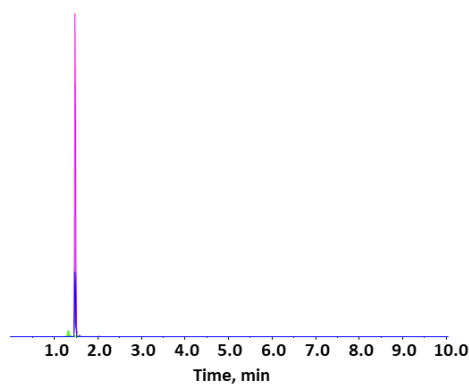

## LCAT

| Protein | Q1 Mass    | Q3 Mass    | Transition Name                |
|---------|------------|------------|--------------------------------|
| LCAT    | 692.88079  | 941.516305 | LCAT.SSGLVSNAPGVQIR.+2y9.light |
| LCAT    | 692.88079  | 669.404235 | LCAT.SSGLVSNAPGVQIR.+2y6.light |
| LCAT    | 696.389372 | 948.533469 | LCAT.SSGLVSNAPGVQIR.+2y9.heavy |
| LCAT    | 696.389372 | 676.421399 | LCAT.SSGLVSNAPGVQIR.+2y6.heavy |

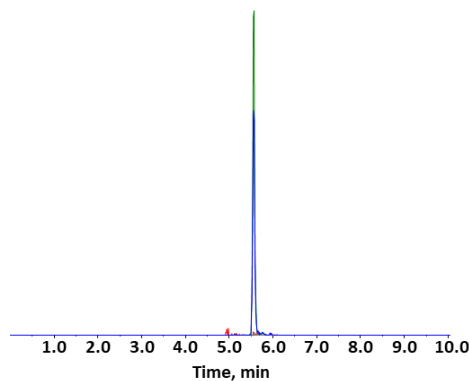

## APO(a)

| Protein | Q1 Mass    | Q3 Mass    | Transition Name             |
|---------|------------|------------|-----------------------------|
| APO(a)  | 521.76182  | 721.383893 | LPA.GTYSTTVTGR.+2y7.light   |
| APO(a)  | 521.76182  | 634.351865 | LPA.GTYSTTVTGR.+2y6.light   |
| APO(a)  | 524.768725 | 727.397702 | LPA.GTYSTTVTGR.+2y7.heavy   |
| APO(a)  | 524.768725 | 640.365674 | LPA.GTYSTTVTGR.+2y6.heavy   |
| APO(a)  | 686.330598 | 877.452642 | LPA.TTEYYPNGGLTR.+2y8.light |
| APO(a)  | 686.330598 | 714.389313 | LPA.TTEYYPNGGLTR.+2y7.light |
| APO(a)  | 689.83918  | 884.469806 | LPA.TTEYYPNGGLTR.+2y8.heavy |
| APO(a)  | 689.83918  | 721.406477 | LPA.TTEYYPNGGLTR.+2y7.heavy |

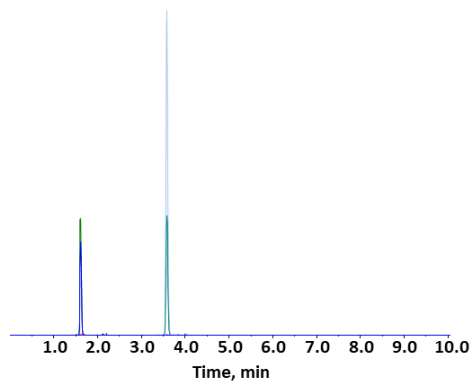

## PLTP

| Protein | Q1 Mass    | Q3 Mass    | Transition Name              |
|---------|------------|------------|------------------------------|
| PLTP    | 599.363713 | 885.540394 | PLTP.AGALQLLLVGDK.+2y8.light |
| PLTP    | 599.363713 | 757.481817 | PLTP.AGALQLLLVGDK.+2y7.light |
| PLTP    | 602.370617 | 891.554203 | PLTP.AGALQLLLVGDK.+2y8.heavy |
| PLTP    | 602.370617 | 763.495626 | PLTP.AGALQLLLVGDK.+2y7.heavy |
| PLTP    | 326.710674 | 440.261593 | PLTP.VLAPPR.+2y4.light       |
| PLTP    | 326.710674 | 369.22448  | PLTP.VLAPPR.+2y3.light       |
| PLTP    | 329.717578 | 446.275402 | PLTP.VLAPPR.+2y4.heavy       |
| PLTP    | 329.717578 | 375.238288 | PLTP.VLAPPR.+2y3.heavy       |

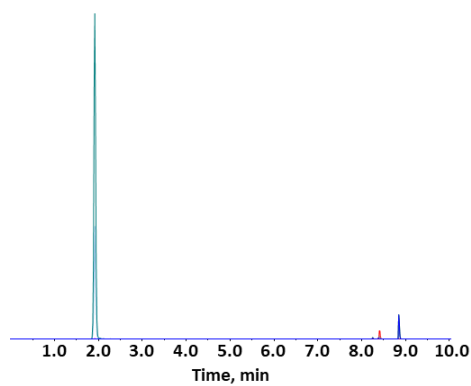

## PON1

| Protein | Q1 Mass    | Q3 Mass     | Transition Name             |
|---------|------------|-------------|-----------------------------|
| PON1    | 592.829703 | 943.509488  | PON1.IQNILTEEPK.+2y8.light  |
| PON1    | 592.829703 | 603.298432  | PON1.IQNILTEEPK.+2y5.light  |
| PON1    | 596.836802 | 951.523687  | PON1.IQNILTEEPK.+2y8.heavy  |
| PON1    | 596.836802 | 611.312631  | PON1.IQNILTEEPK.+2y5.heavy  |
| PON1    | 660.371538 | 1057.604057 | PON1.YVYIAELLAHK.+2y9.light |
| PON1    | 660.371538 | 781.456664  | PON1.YVYIAELLAHK.+2y7.light |
| PON1    | 663.88012  | 1064.621221 | PON1.YVYIAELLAHK.+2y9.heavy |
| PON1    | 663.88012  | 788.473828  | PON1.YVYIAELLAHK.+2y7.heavy |

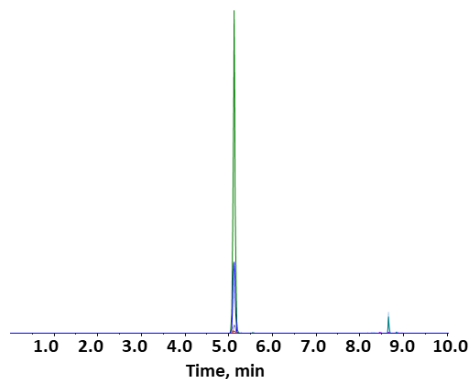

## SAA1

| Protein | Q1 Mass    | Q3 Mass    | Transition Name                  |
|---------|------------|------------|----------------------------------|
| SAA1    | 728.862597 | 903.453036 | SAA1.GPGGVWAAEAIISDAR.+2y9.light |
| SAA1    | 728.862597 | 761.378808 | SAA1.GPGGVWAAEAIISDAR.+2y7.light |
| SAA1    | 733.866731 | 913.461305 | SAA1.GPGGVWAAEAIISDAR.+2y9.heavy |
| SAA1    | 733.866731 | 771.387077 | SAA1.GPGGVWAAEAIISDAR.+2y7.heavy |

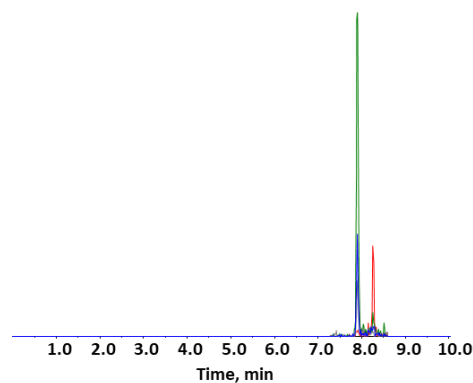

## SSA4

| Protein | Q1 Mass    | Q3 Mass    | Transition Name           |
|---------|------------|------------|---------------------------|
| SAA4    | 421.729595 | 688.377686 | SAA4.GPGGVWAAK.+2y7.light |
| SAA4    | 421.729595 | 631.356222 | SAA4.GPGGVWAAK.+2y6.light |
| SAA4    | 425.736694 | 696.391885 | SAA4.GPGGVWAAK.+2y7.heavy |
| SAA4    | 425.736694 | 639.370421 | SAA4.GPGGVWAAK.+2y6.heavy |

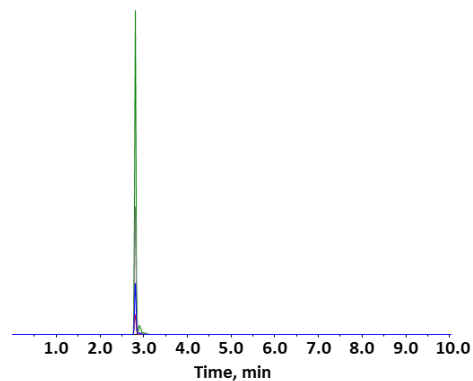

## TF

| Protein | Q1 Mass    | Q3 Mass    | Transition Name        |
|---------|------------|------------|------------------------|
| TF      | 500.752932 | 724.351196 | TF.YLGEEYVK.+2y6.light |
| TF      | 500.752932 | 538.287139 | TF.YLGEEYVK.+2y4.light |
| TF      | 504.760032 | 732.365395 | TF.YLGEEYVK.+2y6.heavy |
| TF      | 504.760032 | 546.301338 | TF.YLGEEYVK.+2y4.heavy |
| TF      | 368.205421 | 678.382102 | TF.GDVAFVK.+2y6.light  |
| TF      | 368.205421 | 563.355159 | TF.GDVAFVK.+2y5.light  |
| TF      | 372.212521 | 686.396301 | TF.GDVAFVK.+2y6.heavy  |
| TF      | 372.212521 | 571.369358 | TF.GDVAFVK.+2y5.heavy  |

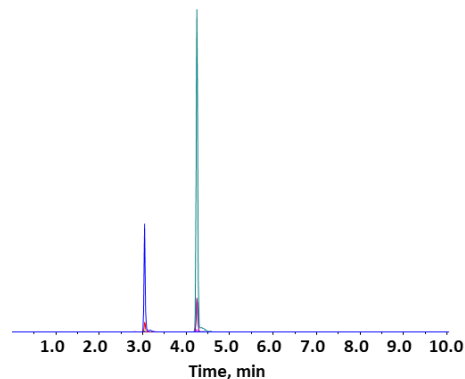

**Figure S7.** Representative chromatograms for targeted proteomics. (a) Representative total chromatogram of the biological sample in targeted proteomics method. (b) Peptide ion chromatograms and transition lists are used for protein identification and quantification.
